# Supplementary material for: Flower-like hierarchical h-MoO3: new findings of efficient visible light driven nano photocatalyst for methylene blue degradation
Source: Royal Society of Chemistry journal article supplement (doi:10.1039/c3cy20764a), 2013-01-01

Cite this: DOI: 10.1039/c0xx00000x

www.rsc.org/Catalysis

## Flower- like hierarchical h-MoO<sub>3</sub>: A new findings of efficient visible light driven nano photocatalyst for methylene blue degradation

5 A. Chithambararaj<sup>a</sup>, N. S. Sanjini<sup>b</sup>, A. Chandra Bose<sup>\*a</sup> and S. Velmathi<sup>b</sup>

<sup>a</sup> Nanomaterials Laboratory, Department of Physics, National Institute of Technology, Tiruchirappalli – 620 015, India. E-mail: acbose@nitt.edu

<sup>b</sup> Organic and polymer synthesis laboratory, Department of Chemistry, National Institute of Technology, Tiruchirappalli – 620 015, India

10

15

(ESI†) S1 Peak shift analysis of h-MoO<sub>3</sub>

20

25

30

35

40

45

50

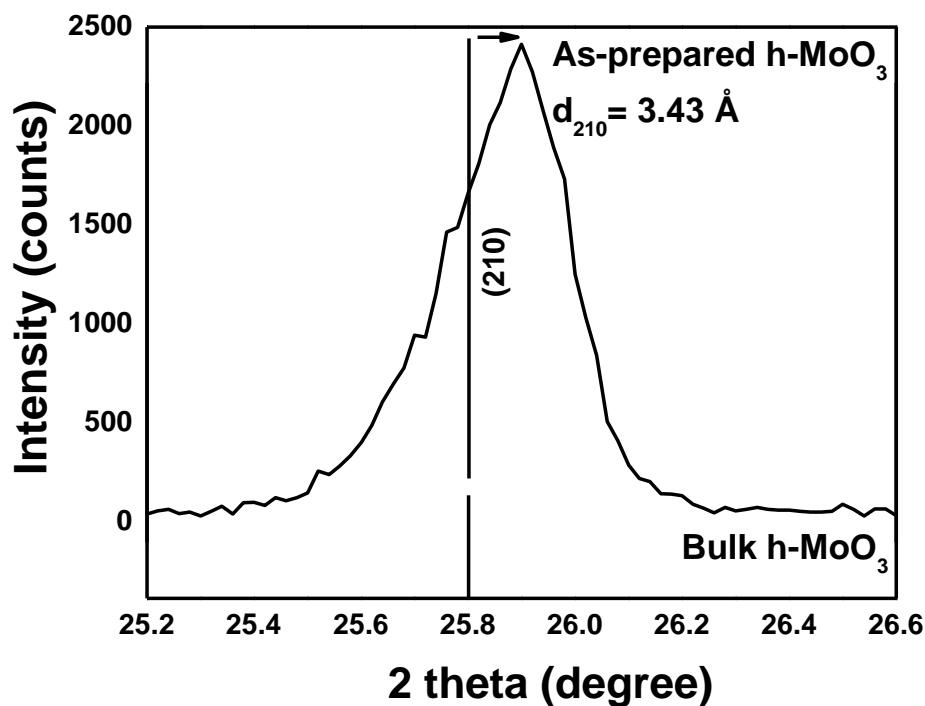

# Flower-like hierarchical h-MoO<sub>3</sub>: A new findings of efficient visible light driven nano photocatalyst for methylene blue degradation

A. Chithambararaj<sup>a</sup>, N. S. Sanjini<sup>b</sup>, A. Chandra Bose\*<sup>a</sup> and S. Velmathi<sup>b</sup>

5 <sup>a</sup> Nanomaterials Laboratory, Department of Physics, National Institute of Technology, Tiruchirappalli – 620 015, India. E-mail: acbose@nitt.edu  
<sup>b</sup> Organic and polymer synthesis laboratory, Department of Chemistry, National Institute of Technology, Tiruchirappalli – 620 015, India

10

(ESI†) S2 Elemental mapping analysis of h-MoO<sub>3</sub>

15

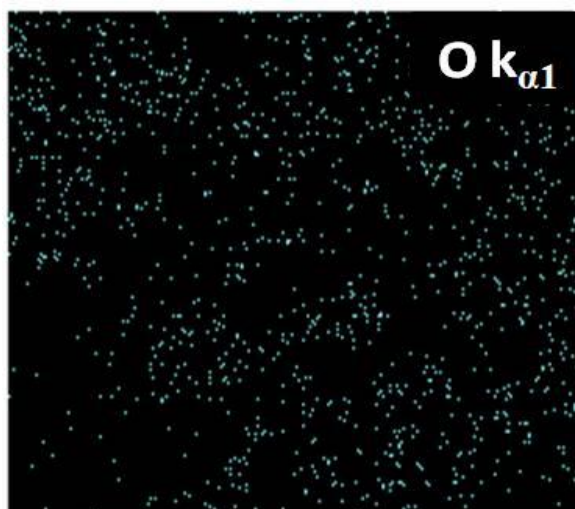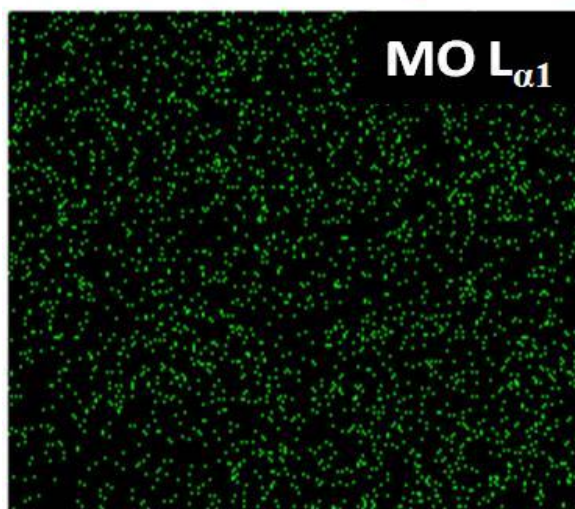

# Flower-like hierarchical h-MoO<sub>3</sub>: A new findings of efficient visible light driven nano photocatalyst for methylene blue degradation

A. Chithambararaj<sup>a</sup>, N. S. Sanjini<sup>b</sup>, A. Chandra Bose<sup>\*a</sup> and S. Velmathi<sup>b</sup>

5

<sup>a</sup> Nanomaterials Laboratory, Department of Physics, National Institute of Technology, Tiruchirappalli – 620 015, India. E-mail: acbose@nitt.edu

<sup>b</sup> Organic and polymer synthesis laboratory, Department of Chemistry, National Institute of Technology, Tiruchirappalli – 620 015, India

10

(ESI†) S3 UV-Vis spectra of MB without catalyst

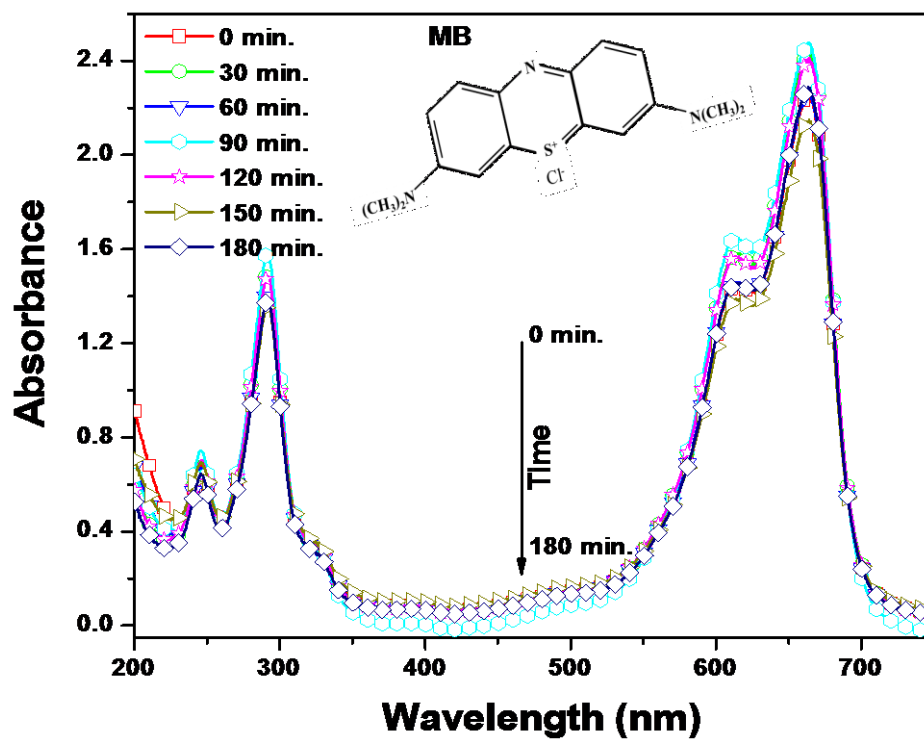

# Flower-like hierarchical h-MoO<sub>3</sub>: A new findings of efficient visible light driven nano photocatalyst for methylene blue degradation

A. Chithambararaj<sup>a</sup>, N. S. Sanjini<sup>b</sup>, A. Chandra Bose\*<sup>a</sup> and S. Velmathi<sup>b</sup>

<sup>a</sup> Nanomaterials Laboratory, Department of Physics, National Institute of Technology, Tiruchirappalli – 620 015, India. E-mail: acbose@nitt.edu

<sup>b</sup> Organic and polymer synthesis laboratory, Department of Chemistry, National Institute of Technology, Tiruchirappalli – 620 015, India

(ESI†) S4 UV-Vis spectral proof for H<sub>2</sub>O<sub>2</sub> formation process in h-MoO<sub>3</sub> aqueous solution

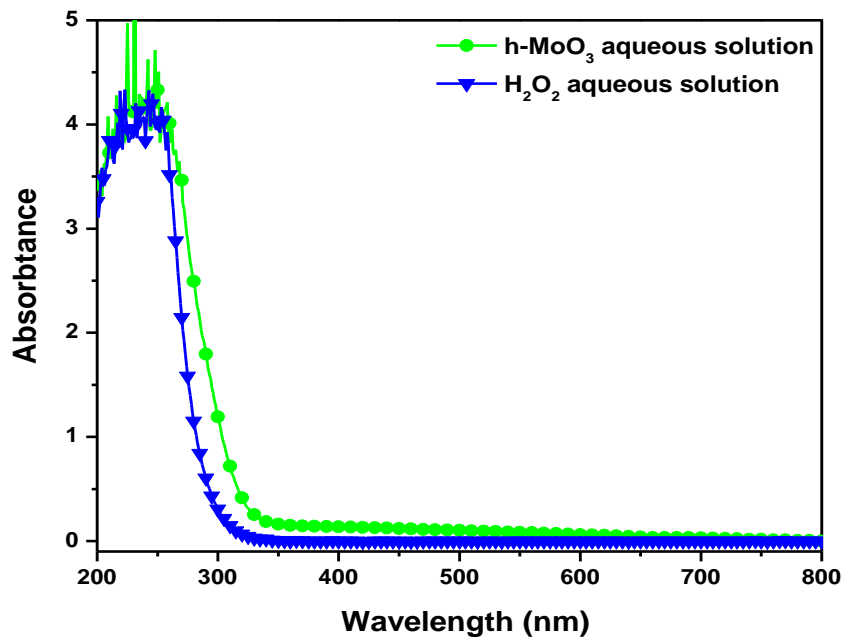

# Flower-like hierarchical h-MoO<sub>3</sub>: A new findings of efficient visible light driven nano photocatalyst for methylene blue degradation

A. Chithambararaj<sup>a</sup>, N. S. Sanjini<sup>b</sup>, A. Chandra Bose\*<sup>a</sup> and S. Velmathi<sup>b</sup>

<sup>a</sup> Nanomaterials Laboratory, Department of Physics, National Institute of Technology, Tiruchirappalli – 620 015, India. E-mail: acbose@nitt.edu

<sup>b</sup> Organic and polymer synthesis laboratory, Department of Chemistry, National Institute of Technology, Tiruchirappalli – 620 015, India

15 (ESI†) S5 FT-IR spectra of h-MoO<sub>3</sub> during photocatalytic reaction

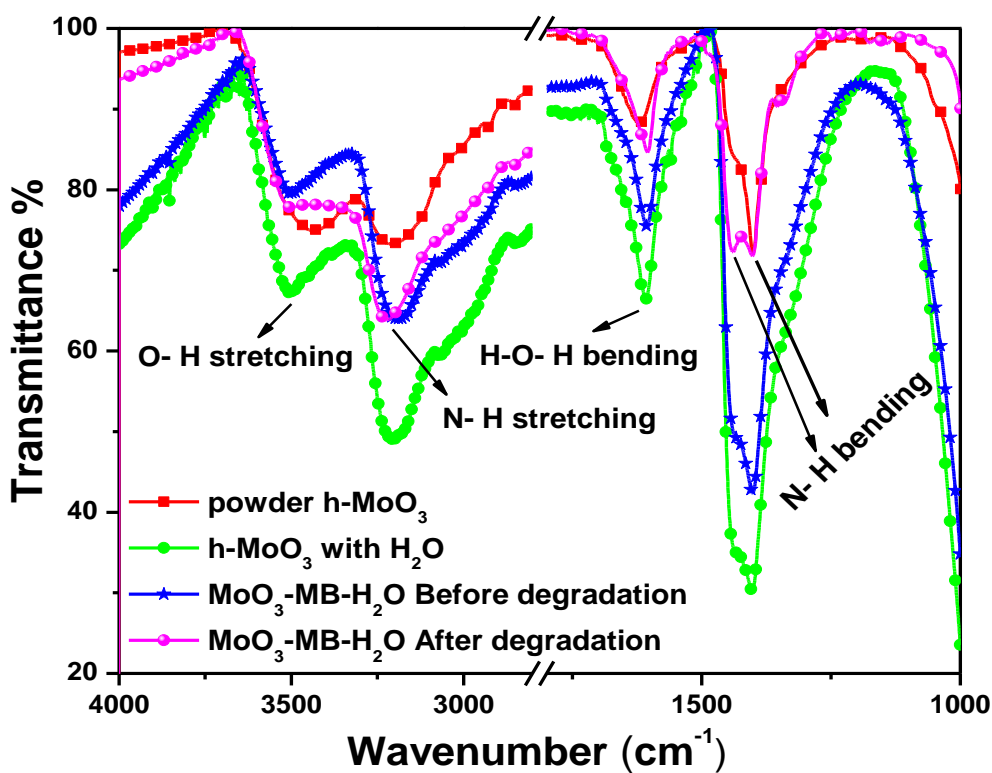

# Flower-like hierarchical h-MoO<sub>3</sub>: A new findings of efficient visible light driven nano photocatalyst for methylene blue degradation

5 A. Chithambararaj<sup>a</sup>, N. S. Sanjini<sup>b</sup>, A. Chandra Bose<sup>\*a</sup> and S. Velmathi<sup>b</sup>

<sup>a</sup> Nanomaterials Laboratory, Department of Physics, National Institute of Technology, Tiruchirappalli – 620 015, India. E-mail: acbose@nitt.edu

<sup>b</sup> Organic and polymer synthesis laboratory, Department of Chemistry, National Institute of Technology, Tiruchirappalli – 620 015, India

10

(ESI†) S6 DRS spectra for visible light (350 W) and UV light (365 nm) irradiated h-MoO<sub>3</sub> for 1h

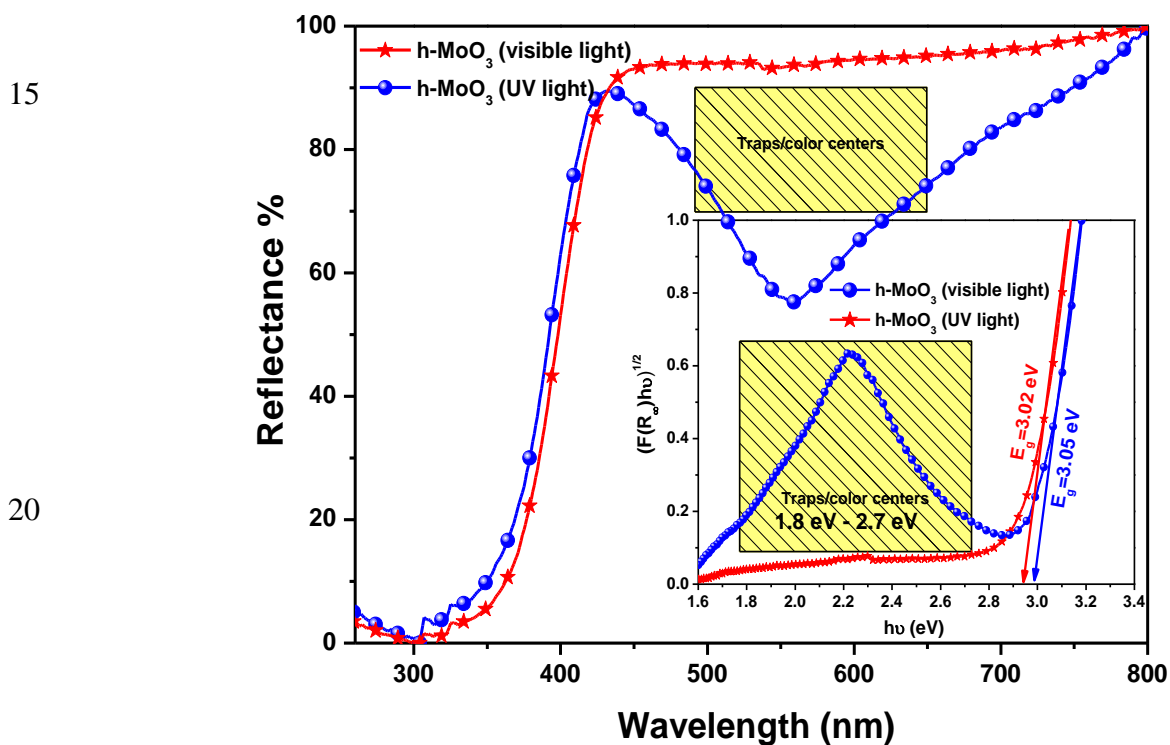

# Flower-like hierarchical h-MoO<sub>3</sub>: A new findings of efficient visible light driven nano photocatalyst for methylene blue degradation

A. Chithambararaj<sup>a</sup>, N. S. Sanjini<sup>b</sup>, A. Chandra Bose\*<sup>a</sup> and S. Velmathi<sup>b</sup>

5 <sup>a</sup> Nanomaterials Laboratory, Department of Physics, National Institute of Technology, Tiruchirappalli – 620 015, India. E-mail: acbose@nitt.edu  
<sup>b</sup> Organic and polymer synthesis laboratory, Department of Chemistry, National Institute of Technology, Tiruchirappalli – 620 015, India

10

(ESI†) S7 XRD pattern of h-MoO<sub>3</sub> before and after photocatalytic reaction

15

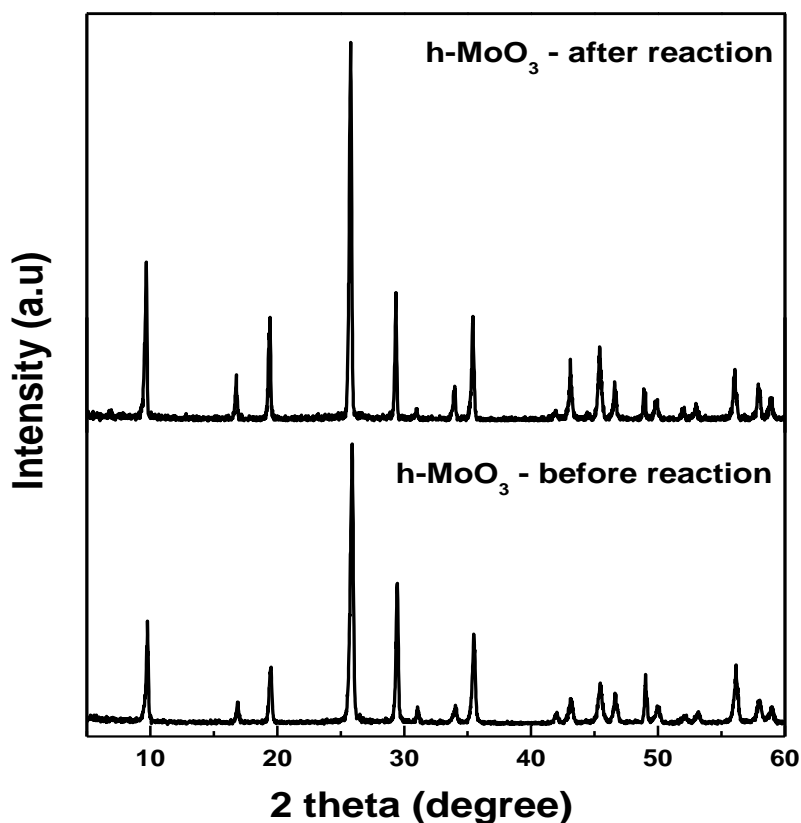

Supplement: c3cy20764a.pdf [file c3cy20764a.pdf]
